# Supplementary material
Source: publisher site journal article supplement (https://www.dovepress.com/article/341420)
Supplement: Supplementary file 1 [file get_supplementary_file.php]

**Supplementary Table 1：**

| Patient ID | Gender | Age | Lesion site | The nature of head and neck cancer lesions | Sample number of tumor for Divescope | Sample number of tumor resection margin for Divescope |
| --- | --- | --- | --- | --- | --- | --- |
| 1 | Male | 51 | larynx | malignant | 1 | 1 |
| 2 | Male | 69 | larynx | benign | 1 | - |
| 3 | Male | 43 | larynx | benign | 1 | - |
| 4 | Male | 62 | lower pharynx | malignant | 1 | 1 |
| 5 | Male | 54 | lower pharynx | malignant | 1 | 1 |
| 6 | Male | 55 | larynx | malignant | 1 | 1 |
| 7 | Male | 65 | oropharynx | malignant | 1 | 1 |
| 8 | Female | 52 | larynx | malignant | 1 | - |
| 9 | Male | 60 | larynx | malignant | 1 | 1 |
| 10 | Male | 44 | larynx | benign | 1 | - |
| 11 | Male | 63 | larynx | malignant | 1 | 1 |
| 12 | Male | 59 | larynx | benign | 1 | - |
| 13 | Male | 48 | larynx | malignant | 1 | - |
| 14 | Male | 62 | larynx | benign | 1 | - |
| 15 | Female | 50 | larynx | benign | 1 | - |
| 16 | Male | 73 | larynx | benign | 1 | - |
| 17 | Male | 60 | larynx | malignant | 1 | 1 |
| 18 | Male | 44 | larynx | benign | 1 | - |
| 19 | Male | 39 | larynx | benign | 1 | - |
| 20 | Male | 82 | larynx | benign | 1 | - |
| 21 | Male | 41 | oropharynx | benign | 1 | - |
| 22 | Male | 57 | oropharynx | malignant | 1 | 1 |
| 23 | Female | 48 | oropharynx | benign | 1 | - |
| 24 | Female | 45 | oropharynx | benign | 1 | - |
| 25 | Male | 48 | larynx | malignant | 1 | 1 |
| 26 | Female | 29 | oropharynx | benign | 1 | - |
| 27 | Male | 61 | larynx | malignant | 1 | - |
| 28 | Female | 59 | oropharynx | benign | 1 | - |
| 29 | Male | 40 | larynx | benign | 1 | - |
| 30 | Female | 51 | larynx | benign | 1 | - |
| 31 | Male | 88 | larynx | malignant | 1 | 1 |
| 32 | Male | 59 | lower pharynx | malignant | 1 | 1 |
| 33 | Male | 53 | larynx | malignant | 1 | - |
| 34 | Male | 76 | larynx | malignant | 1 | 1 |
| 35 | Male | 58 | larynx | malignant | 1 | 1 |
| 36 | Male | 56 | larynx | benign | 1 | - |
| 37 | Male | 66 | larynx | malignant | 1 | 1 |
| 38 | Male | 62 | larynx | benign | 1 | - |
| 39 | Female | 41 | oropharynx | benign | 1 | - |
| 40 | Male | 69 | larynx | benign | 1 | - |
| 41 | Male | 46 | larynx | benign | 1 | - |
| 42 | Male | 70 | larynx | malignant | 1 | 1 |
| 43 | Male | 50 | larynx | malignant | 1 | 1 |
| 44 | Male | 45 | larynx | malignant | 1 | 1 |
| 45 | Male | 56 | larynx | malignant | 1 | 1 |
| 46 | Male | 50 | larynx | malignant | 1 | 1 |
| 47 | Male | 48 | larynx | malignant | 1 | 1 |
